# Supplementary material
Source: PubMed Central journal article supplement (PMC10756222)
Supplement: EIJ-D-23-00375_Bay_SD.pdf [file EIJ-D-23-00375_Bay_SD.pdf]

## Supplementary data

**Supplementary Table 1. Incident myocardial infarctions during follow-up for the rPCI and mPCI groups.**

| <b>rPCI (n=6)</b> |                         |                          |                   |                                                                                                                                                                       |
|-------------------|-------------------------|--------------------------|-------------------|-----------------------------------------------------------------------------------------------------------------------------------------------------------------------|
|                   | <b>Index PCI Lesion</b> | <b>FU Revasc. Lesion</b> | <b>Type of MI</b> | <b>Comment</b>                                                                                                                                                        |
| Case 1            | RCA                     |                          | NSTEMI Type II    | Hypertensive crisis, no culprit-lesion in coronary angiography                                                                                                        |
| Case 2            | LAD                     |                          | NSTEMI Type II    | Hypertensive crisis, no culprit-lesion in coronary angiography                                                                                                        |
| Case 3            | LAD                     |                          | NSTEMI Type II    | Critical aortic valve stenosis, no culprit-lesion in coronary angiography                                                                                             |
| Case 4            | RCA                     |                          | NSTEMI Type II    | Atrial fibrillation, no culprit-lesion in coronary angiography                                                                                                        |
| Case 5            | LM/LAD                  | M1                       | NSTEMI Type I     | Non TLR, PCI M1 carried out                                                                                                                                           |
| Case 6            | LAD                     | LAD                      | STEMI Type IVb    | TLR, early (8 days after index PCI) in-stent thrombosis due to subtherapeutic INR levels (Vitamin-K Antagonist+Clopidogrel, ASA only for index procedure), Re-PCI LAD |
| <b>mPCI (n=7)</b> |                         |                          |                   |                                                                                                                                                                       |
|                   | <b>Index PCI Lesion</b> | <b>FU Revasc. Lesion</b> | <b>Type of MI</b> | <b>Comment</b>                                                                                                                                                        |
| Case 1            | RCA                     | LAD                      | NSTEMI Type I     | Non TLR, PCI LAD carried out                                                                                                                                          |
| Case 2            | LCx                     | RCA                      | NSTEMI Type I     | Non TLR, PCI LAD carried out                                                                                                                                          |
| Case 3            | LAD                     | LAD                      | NSTEMI Type IVc   | TLR, in-stent restenosis (11 months after the index PCI), comorbidities included a dialysis dependent chronic kidney disease, CABG carried out                        |
| Case 4            | LAD                     | -                        | NSTEMI Type IVa   | Planned LAD intervention at index PCI, dissection of target lesion during index procedure with no-reflow. Due to rising Troponin levels and ST-                       |

|        |     |     |                 |                                                                                                                                                                                                                                                                                                                                                  |
|--------|-----|-----|-----------------|--------------------------------------------------------------------------------------------------------------------------------------------------------------------------------------------------------------------------------------------------------------------------------------------------------------------------------------------------|
|        |     |     |                 | segment changes re-angiography with documentation of a unchanged coronary vessel situation. No further intervention attempted due to asymptomatic patient.                                                                                                                                                                                       |
| Case 5 | LAD | -   | NSTEMI Type IVa | Coronary perforation in index procedure with subsequent cardiac tamponade hours later, LAD after initial implantation of covered stents with good short-term result                                                                                                                                                                              |
| Case 6 | RCA | RCA | NSTEMI typ IVa  | TLR, index PCI targeting a heavily calcified RCA stenosis using rotablation. During the index stay (1 day after index PCI) rising Troponin levels, new ST-Segment depression and chest pain was noted. Re-angiography with post-dilatation using high-pressure balloons and implantation of additional one DES due to suspected edge dissection. |
| Case 7 | LCx | LAD | NSTEMI Type I   | Index PCI with CFx intervention in the setting of a NSTEMI. During index stay persistent ST-Segment depression and chest pain with subsequent LAD PCI.                                                                                                                                                                                           |

Type of myocardial infarction was classified according to the 4th Universal definition.[20] CABG Coronary artery bypass grafting; LCx: Left circumflex artery; FU Follow-up; LAD Left anterior descending artery; LM Left main coronary artery; M1 First marginal branch of the left circumflex artery; MI Myocardial infarction; NSTEMI Non-ST-Segment elevation myocardial infarction; PCI Percutaneous coronary intervention; RCA Right coronary artery; Revasc. Revascularisation; TLR Target lesion revascularisation.
